# Supplementary material for: Effects of 24 Weeks of a Supervised Walk Training on Knee Muscle Strength and Quality of Life in Older Female Total Knee Arthroplasty: A Retrospective Cohort Study
Source: MDPI journal article supplement (doi:10.3390/healthcare11030356), 2023-01-26
Supplement: s1 [file s1]

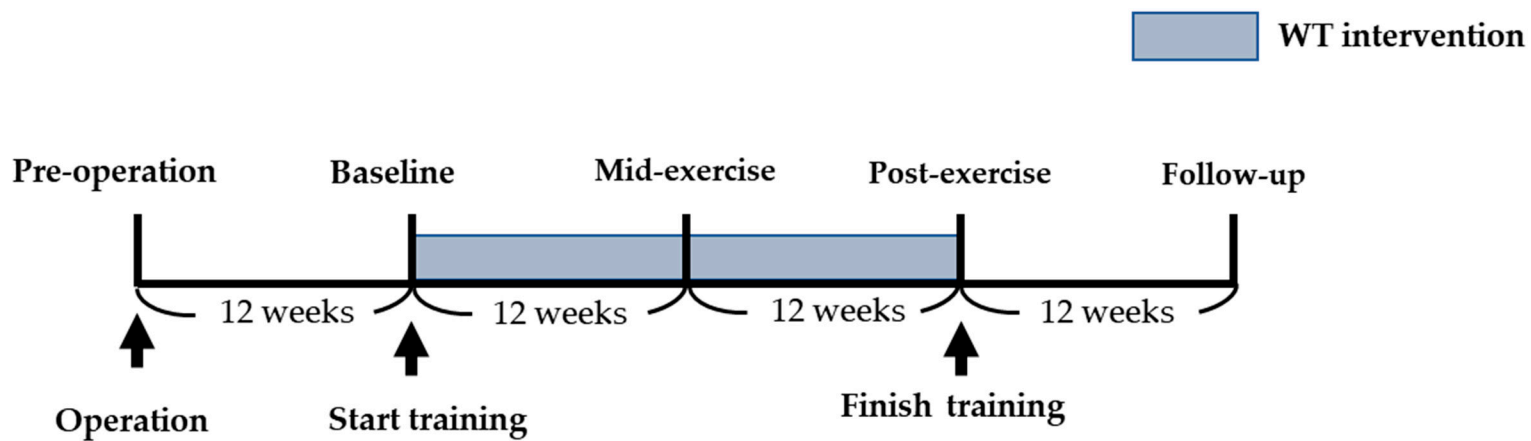

Supplementary Figure S1. Schematic diagram of the experimental time course.

**Supplementary Table S1. The coefficient of validity and reliability in the WT and CON groups.**

|     |         | Coefficient of variation (%) |              |               |           | Typical error                     |                                |                                     | Intraclass correlation coefficient |
|-----|---------|------------------------------|--------------|---------------|-----------|-----------------------------------|--------------------------------|-------------------------------------|------------------------------------|
|     |         | Baseline                     | Mid-exercise | Post-exercise | Follow-up | Between mid-exercise and baseline | Between post- and mid-exercise | Between follow-up and post-exercise |                                    |
| WT  | HE      | 45                           | 47           | 37            | 33        | 5                                 | 5                              | 14                                  | 0.573                              |
|     | HF      | 41                           | 48           | 49            | 63        | 3                                 | 3                              | 9                                   | 0.724                              |
|     | KE      | 42                           | 39           | 40            | 38        | 4                                 | 4                              | 9                                   | 0.873                              |
|     | KF      | 25                           | 29           | 25            | 16        | 4                                 | 3                              | 10                                  | 0.525                              |
|     | 6MWT    | 24                           | 23           | 24            | 30        | 22                                | 5                              | 18                                  | 0.897                              |
|     | 8UG     | 28                           | 21           | 36            | 34        | 5                                 | 1                              | 3                                   | 0.774                              |
|     | 30s-CST | 23                           | 28           | 27            | 35        | 5                                 | 1                              | 4                                   | 0.837                              |
|     | Sym     | 29                           | 25           | 16            | 16        | 13                                | 3                              | 11                                  | 0.402                              |
|     | Pain    | 20                           | 24           | 16            | 13        | 13                                | 3                              | 9                                   | 0.544                              |
|     | ADL     | 21                           | 22           | 8             | 12        | 14                                | 4                              | 9                                   | 0.448                              |
|     | Sports  | 31                           | 35           | 32            | 37        | 15                                | 4                              | 13                                  | 0.177                              |
|     | QoL     | 38                           | 32           | 24            | 20        | 14                                | 4                              | 14                                  | 0.521                              |
| CON | HE      | 30                           | 47           | 36            | 37        | 4                                 | 4                              | 12                                  | 0.608                              |
|     | HF      | 39                           | 62           | 50            | 35        | 3                                 | 3                              | 6                                   | 0.550                              |
|     | KE      | 43                           | 29           | 19            | 22        | 3                                 | 3                              | 9                                   | 0.474                              |
|     | KF      | 35                           | 27           | 28            | 22        | 3                                 | 3                              | 7                                   | 0.586                              |
|     | 6MWT    | 19                           | 17           | 19            | 18        | 5                                 | 4                              | 14                                  | 0.829                              |
|     | 8UG     | 26                           | 23           | 35            | 25        | 5                                 | 1                              | 3                                   | 0.613                              |
|     | 30s-CST | 31                           | 20           | 24            | 21        | 5                                 | 1                              | 2                                   | 0.706                              |
|     | Sym     | 25                           | 21           | 25            | 15        | 13                                | 4                              | 10                                  | 0.385                              |
|     | Pain    | 16                           | 15           | 20            | 9         | 11                                | 4                              | 11                                  | 0.074                              |
|     | ADL     | 15                           | 24           | 25            | 7         | 13                                | 4                              | 11                                  | 0.147                              |
|     | Sports  | 41                           | 29           | 39            | 26        | 12                                | 3                              | 8                                   | 0.472                              |
|     | QoL     | 30                           | 40           | 36            | 24        | 17                                | 5                              | 14                                  | 0.201                              |

Abbreviation: CON: Control; WT: Walk Training; HE: Hip Extension; HF: Hip Flexion; KE: Knee Extension; KF: Knee Flexion; 6MWT: 6-minutes’ walk test; 8UG: 8 feet up and go; 30s-CST: 30-second chair stand test; Sym: Symptom; ADL: Activity of daily livings; QoL: Quality of life.

**Supplementary Table S2. Shapiro-Wilk test of normality.**

| Shapiro-Wilk test         |              |          |
|---------------------------|--------------|----------|
|                           | Shapiro-Wilk | <i>p</i> |
| Hip Extension             | .953         | .229     |
| Hip Flexion               | .967         | .507     |
| Knee Extension            | .974         | .690     |
| Knee Flexion              | .953         | .239     |
| 6MWT                      | .952         | .345     |
| 8-Ft Up-and-Go            | .861         | .052     |
| 30s-CST                   | .948         | .290     |
| Symptom                   | .909         | .094     |
| Pain                      | .886         | .061     |
| Activity of daily livings | .908         | .091     |
| Sports                    | .854         | .051     |
| Quality of life           | .898         | .063     |
